# Supplementary material
Source: PubMed Central journal article supplement (PMC8914910)
Supplement: jamaotolaryngolheadnecksurg-e214549-s001.pdf [file jamaotolaryngolheadnecksurg-e214549-s001.pdf]

## Supplementary Online Content

Schuster-Bruce J, Jani C, Goodall R, et al. A comparison of the burden of thyroid cancer between the European Union 15+ countries, 1990-2019: estimates from the Global Burden of Disease study. *JAMA Otolaryngol Head Neck Surg*. Published online March 10, 2022. doi:10.1001/jamaoto.2021.4549

**eTable 1.** Joinpoint Analysis for Thyroid Cancer Age-Standardized Incidence Rates in EU15+ Countries for Years 1990-2019 for Both Sexes

**eTable 2.** 1990 and 2019 Male Age-Standardized Mortality Rates (ASMRS), Age-Standardized Incidence Rates (ASIRs), Mortality-to-Incidence Indices (MIIs) and Disability-Adjusted Life Years (DALYS), With Associated Percentage Changes, for Thyroid Cancer in the European Union 15+ Countries

**eTable 3.** 1990 and 2019 Female Age-Standardized Mortality Rates (ASMRS), Age-Standardized Incidence Rates (ASIRs), Mortality-to-Incidence Indices (MIIs) and Disability-Adjusted Life Years (DALYS), With Associated Percentage Changes, for Thyroid Cancer in the European Union 15+ Countries

**eTable 4.** Joinpoint Analysis for Thyroid Cancer Age-Standardized Incidence Rates in EU15+ Countries for Years 1990-2019 in Males, Females

**eTable 5.** Joinpoint Analysis for Thyroid Cancer Age-Standardized Mortality Rates in EU15+ Countries for Years 1990-2019 for Both Sexes

**eTable 6.** Joinpoint Analysis for Thyroid Cancer Age-Standardized Mortality Rates in EU15+ Countries for Years 1990-2019 in Males, Females

**eTable 7.** Joinpoint Analysis for Thyroid Cancer Age-Standardized DALYs in EU15+ Countries for Years 1990-2019 in Both Sexes

This supplementary material has been provided by the authors to give readers additional information about their work.

**eTable 1: Joinpoint analysis for thyroid cancer age-standardized incidence rates in EU15+ countries for years 1990-2019 for both sexes.**

| Country                  | Trend 1   |                  |         | Trend 2   |                   |         | Trend 3   |                   |         | Trend 4   |                   |         | AAPC      |                  |         |
|--------------------------|-----------|------------------|---------|-----------|-------------------|---------|-----------|-------------------|---------|-----------|-------------------|---------|-----------|------------------|---------|
|                          | Years     | EAPC (95% CI)    | P-Value | Years     | EAPC (95% CI)     | P-Value | Years     | EAPC (95% CI)     | P-Value | Years     | EAPC (95% CI)     | P-Value | Years     | AAPC (95% CI)    | P value |
| Global                   | 1990-2002 | 1.5- (1.5-1.6)   | <0.001  | 2002-2010 | 1.8- (1.7-2)      | <0.001  | 2010-2015 | -0.5- (-0.9--0.1) | 0.014   | 2015-2019 | 0.8- (0.4-1.1)    | <0.001  | 1990-2019 | 1.1( 1.1-1.2)    | <0.001  |
| Australia                | 1990-1994 | 2.6- (1.2-4.1)   | 0.001   | 1994-2009 | 4.3- (4-4.5)      | <0.001  | 2009-2019 | -0.5- (-0.9--0.2) | 0.005   |           |                   |         | 1990-2019 | 2.5( 2.3-2.7)    | <0.001  |
| Austria                  | 1990-1994 | 2- (0.6-3.5)     | 0.009   | 1994-2000 | 0.1- (-0.9-1.1)   | 0.766   | 2000-2007 | -2.9- (-3.6--2.1) | <0.001  | 2007-2019 | -0.5- (-0.7--0.2) | 0.001   | 1990-2019 | -0.8( -1.1--0.4) | <0.001  |
| Belgium                  | 1990-1994 | 1.7- (0.4-3.1)   | 0.016   | 1994-2000 | -3.6- (-4.5--2.7) | <0.001  | 2000-2010 | 1.7- (1.3-2.1)    | <0.001  | 2010-2019 | -0.8- (-1.2--0.4) | <0.001  | 1990-2019 | -0.2( -0.6-0.2)  | 0.236   |
| Denmark                  | 1990-1997 | 6.5- (5.6-7.5)   | <0.001  | 1997-2009 | 1.9- (1.4-2.4)    | <0.001  | 2009-2019 | -0.2- (-0.7-0.4)  | 0.482   |           |                   |         | 1990-2019 | 2.4( 2-2.8)      | <0.001  |
| Finland                  | 1990-2002 | 1.8- (1.3-2.3)   | <0.001  | 2002-2010 | 3- (1.9-4.1)      | <0.001  | 2010-2019 | -2.1- (-2.7--1.4) | <0.001  |           |                   |         | 1990-2019 | 1( 0.7-1.3)      | <0.001  |
| France                   | 1990-1997 | 1.4- (0.4-2.4)   | 0.006   | 1997-2005 | 5.3- (4.3-6.3)    | <0.001  | 2005-2014 | -5.3- (-6--4.6)   | <0.001  | 2014-2019 | -0.3- (-1.8-1.3)  | 0.735   | 1990-2019 | -0.1( -0.6-0.4)  | 0.811   |
| Germany                  | 1990-1994 | 3.2- (2.2-4.3)   | <0.001  | 1994-2002 | -1.6- (-2--1.1)   | <0.001  | 2002-2010 | 1.1- (0.7-1.6)    | <0.001  | 2010-2019 | -0.6- (-0.9--0.3) | 0.001   | 1990-2019 | 0( -0.2-0.1)     | 0.834   |
| Greece                   | 1990-1992 | 7- (2.5-11.7)    | 0.004   | 1992-2007 | 1.1- (0.9-1.3)    | <0.001  | 2007-2016 | -1.6- (-2.1--1.2) | <0.001  | 2016-2019 | 1.3- (-0.9-3.5)   | 0.236   | 1990-2019 | 0.2( 0-0.5)      | 0.058   |
| Ireland                  | 1990-1996 | -0.6- (-1.4-0.3) | 0.174   | 1996-2002 | 2- (0.8-3.1)      | 0.002   | 2002-2009 | 4- (3.1-4.9)      | <0.001  | 2009-2019 | -0.1- (-0.5-0.3)  | 0.535   | 1990-2019 | 1.5( 1-2.1)      | <0.001  |
| Italy                    | 1990-2003 | 1.2- (1-1.4)     | <0.001  | 2003-2016 | -1.7- (-1.9--1.4) | <0.001  | 2016-2019 | 0.5- (-1.5-2.6)   | 0.609   |           |                   |         | 1990-2019 | -0.3( -0.4--0.1) | <0.001  |
| Luxembourg               | 1990-1996 | 2.5- (2-2.9)     | <0.001  | 1996-2007 | 0.3- (0.1-0.5)    | 0.003   | 2007-2017 | -2.2- (-2.4--2)   | <0.001  | 2017-2019 | 0.2- (-2.4-2.8)   | 0.871   | 1990-2019 | -0.4( -0.5--0.2) | <0.001  |
| Netherlands              | 1990-1998 | 0.7- (0.2-1.2)   | 0.011   | 1998-2010 | 2.3- (2-2.6)      | <0.001  | 2010-2019 | 0.3- (-0.1-0.8)   | 0.114   |           |                   |         | 1990-2019 | 1.4( 1.1-1.7)    | <0.001  |
| Norway                   | 1990-2011 | 2- (1.9-2.1)     | <0.001  | 2011-2019 | -1.3- (-1.8--0.9) | <0.001  |           |                   |         |           |                   |         | 1990-2019 | 1.1( 0.9-1.2)    | <0.001  |
| Portugal                 | 1990-1997 | 3- (2.1-3.9)     | <0.001  | 1997-2005 | -2.8- (-3.6--2)   | <0.001  | 2005-2009 | 3- (-0.3-6.4)     | 0.072   | 2009-2019 | -0.4- (-0.9-0.2)  | 0.16    | 1990-2019 | 0.2( -0.5-1)     | 0.563   |
| Spain                    | 1990-2008 | 1.9- (1.8-2)     | <0.001  | 2008-2016 | -1.4- (-1.8--0.9) | <0.001  | 2016-2019 | 0.3- (-1.3-1.8)   | 0.725   |           |                   |         | 1990-2019 | 0.7( 0.6-0.9)    | <0.001  |
| Sweden                   | 1990-2000 | -0.3- (-0.6-0)   | 0.028   | 2000-2011 | 1.8- (1.5-2.1)    | <0.001  | 2011-2019 | -0.7- (-1.2--0.3) | 0.001   |           |                   |         | 1990-2019 | 0.5( 0.1-0.9)    | 0.008   |
| United Kingdom           | 1990-1997 | 0.1- (-0.4-0.6)  | 0.657   | 1997-2008 | 1.5- (1.2-1.8)    | <0.001  | 2008-2019 | 0.9- (0.7-1.2)    | <0.001  |           |                   |         | 1990-2019 | 1( 0.9-1.2)      | <0.001  |
| Canada                   | 1990-2003 | 3.1- (2.9-3.2)   | <0.001  | 2003-2010 | -0.6- (-1.1-0)    | 0.048   | 2010-2013 | -3.8- (-6.9--0.5) | 0.027   | 2013-2019 | 0.1- (-0.5-0.6)   | 0.854   | 1990-2019 | 0.7( 0.5-0.9)    | <0.001  |
| United States of America | 1990-1993 | 3.4- (1.7-5.2)   | <0.001  | 1993-2001 | 2- (1.5-2.4)      | <0.001  | 2001-2011 | 0.8- (0.5-1.1)    | <0.001  | 2011-2019 | 0- (-0.4-0.3)     | 0.837   | 1990-2019 | 1.2( 1-1.3)      | <0.001  |

EAPC indicates estimated annual percentage change, with 95% confidence intervals in brackets. \*Significantly different from 0 (P<0.05).

**eTable 2: 1990 and 2019 male age-standardized mortality rates (ASMRs), age-standardized incidence rates (ASIRs), mortality-to-incidence indices (MIIs) and disability-adjusted life years (DALYs), with associated percentage changes, for thyroid cancer in the European Union 15+ countries.**

| Country                         | ASMRs            |                  |          | ASIR             |                  |          | MIIs             |                  |          | DALYS               |                     |          |
|---------------------------------|------------------|------------------|----------|------------------|------------------|----------|------------------|------------------|----------|---------------------|---------------------|----------|
|                                 | 1990.00          | 2019.00          | % Change | 1990.00          | 2019.00          | % Change | 1990.00          | 2019.00          | % Change | 1990.00             | 2019.00             | % Change |
| <b>Global</b>                   | 0.43 (0.48-0.39) | 0.50 (0.55-0.45) | 16.83    | 1.15 (1.24-1.08) | 1.90 (2.07-1.70) | 64.19    | 0.37 (0.38-0.36) | 0.26 (0.26-0.26) | -28.85   | 11.21 (12.63-10.21) | 12.92 (14.02-11.69) | 15.31    |
| <b>Australia</b>                | 0.36 (0.40-0.32) | 0.43 (0.49-0.31) | 19.65    | 1.66 (1.89-1.46) | 3.25 (4.35-2.30) | 95.77    | 0.22 (0.21-0.22) | 0.13 (0.11-0.13) | -38.88   | 9.297 (10.23-8.394) | 11.49 (13.28-8.758) | 23.69    |
| <b>Austria</b>                  | 0.71 (0.78-0.50) | 0.48 (0.56-0.39) | -31.81   | 3.12 (3.61-2.37) | 3.31 (4.41-2.44) | 6.05     | 0.22 (0.21-0.21) | 0.14 (0.12-0.16) | -35.70   | 17.46 (19.32-12.59) | 12.09 (14.41-10.19) | -30.74   |
| <b>Belgium</b>                  | 0.67 (0.75-0.53) | 0.54 (0.62-0.44) | -19.58   | 2.63 (3.09-2.02) | 3.67 (4.95-2.63) | 39.47    | 0.25 (0.24-0.26) | 0.14 (0.12-0.16) | -42.34   | 16.80 (18.77-13.05) | 14.38 (17.03-11.79) | -14.38   |
| <b>Denmark</b>                  | 0.23 (0.32-0.21) | 0.34 (0.40-0.27) | 42.55    | 0.97 (1.33-0.83) | 2.14 (2.86-1.52) | 119.68   | 0.24 (0.24-0.25) | 0.15 (0.13-0.17) | -35.11   | 6.187 (8.460-5.515) | 8.696 (10.48-6.802) | 40.53    |
| <b>Finland</b>                  | 0.49 (0.54-0.43) | 0.50 (0.58-0.36) | 2.38     | 1.91 (2.23-1.64) | 3.10 (4.08-2.24) | 62.33    | 0.25 (0.24-0.26) | 0.16 (0.14-0.16) | -36.93   | 12.39 (13.89-11.01) | 12.33 (14.54-9.641) | -0.48    |
| <b>France</b>                   | 0.55 (0.60-0.51) | 0.47 (0.54-0.38) | -15.78   | 2.32 (2.65-1.98) | 3.38 (4.58-2.42) | 45.83    | 0.24 (0.22-0.25) | 0.13 (0.11-0.15) | -42.25   | 14.75 (15.95-13.21) | 12.76 (15.18-10.45) | -13.49   |
| <b>Germany</b>                  | 0.65 (0.70-0.50) | 0.52 (0.58-0.40) | -20.52   | 2.36 (2.65-1.75) | 3.05 (4.13-2.16) | 29.10    | 0.27 (0.26-0.28) | 0.17 (0.14-0.18) | -38.44   | 16.66 (18.00-12.34) | 13.25 (15.34-10.36) | -20.45   |
| <b>Greece</b>                   | 0.37 (0.40-0.33) | 0.38 (0.43-0.34) | 3.62     | 1.56 (1.81-1.35) | 2.44 (3.24-1.79) | 56.19    | 0.23 (0.22-0.24) | 0.15 (0.13-0.19) | -33.66   | 9.198 (10.20-8.278) | 10.12 (11.67-8.698) | 10.06    |
| <b>Ireland</b>                  | 0.49 (0.55-0.38) | 0.38 (0.45-0.27) | -22.91   | 1.67 (1.93-1.35) | 2.47 (3.35-1.70) | 47.97    | 0.29 (0.28-0.28) | 0.15 (0.13-0.16) | -47.90   | 11.63 (12.96-9.255) | 9.374 (11.35-6.860) | -19.41   |
| <b>Italy</b>                    | 0.59 (0.61-0.52) | 0.47 (0.52-0.37) | -19.61   | 4.21 (4.76-3.41) | 4.93 (6.60-3.53) | 17.08    | 0.14 (0.12-0.15) | 0.09 (0.08-0.10) | -31.33   | 16.61 (17.72-13.79) | 13.13 (15.21-10.01) | -20.92   |
| <b>Luxembourg</b>               | 1.03 (1.15-0.92) | 0.70 (0.84-0.57) | -32.51   | 4.05 (4.64-3.45) | 4.60 (6.04-3.54) | 13.72    | 0.25 (0.24-0.26) | 0.15 (0.14-0.16) | -40.65   | 26.38 (29.35-23.15) | 17.88 (22.23-14.50) | -32.21   |
| <b>Netherlands</b>              | 0.40 (0.44-0.32) | 0.42 (0.49-0.26) | 4.18     | 1.80 (2.07-1.40) | 2.81 (3.82-1.81) | 55.85    | 0.22 (0.21-0.23) | 0.15 (0.12-0.14) | -33.15   | 10.04 (11.13-7.938) | 10.40 (12.24-6.660) | 3.52     |
| <b>Norway</b>                   | 0.43 (0.46-0.41) | 0.41 (0.47-0.34) | -3.42    | 2.16 (2.46-1.92) | 3.36 (4.43-2.55) | 55.68    | 0.20 (0.19-0.21) | 0.12 (0.10-0.13) | -37.96   | 11.19 (12.19-10.58) | 10.67 (12.35-9.041) | -4.66    |
| <b>Portugal</b>                 | 0.53 (0.59-0.45) | 0.45 (0.52-0.36) | -14.68   | 1.31 (1.49-1.09) | 2.11 (2.90-1.51) | 61.49    | 0.40 (0.39-0.41) | 0.21 (0.18-0.24) | -47.17   | 13.18 (14.60-11.01) | 11.51 (13.50-9.291) | -12.65   |
| <b>Spain</b>                    | 0.42 (0.46-0.35) | 0.42 (0.48-0.28) | -1.21    | 1.91 (2.17-1.40) | 2.99 (4.17-1.95) | 56.74    | 0.22 (0.21-0.24) | 0.14 (0.11-0.14) | -36.97   | 11.56 (12.69-8.824) | 11.11 (13.07-7.325) | -3.96    |
| <b>Sweden</b>                   | 0.46 (0.51-0.41) | 0.40 (0.44-0.35) | -13.57   | 1.75 (2.03-1.57) | 1.82 (2.35-1.41) | 3.93     | 0.26 (0.25-0.26) | 0.21 (0.19-0.25) | -16.84   | 10.97 (12.36-10.00) | 9.394 (10.53-8.343) | -14.40   |
| <b>United Kingdom</b>           | 0.38 (0.41-0.35) | 0.36 (0.38-0.33) | -6.20    | 1.64 (1.75-1.52) | 2.24 (2.89-1.71) | 36.72    | 0.23 (0.23-0.23) | 0.16 (0.13-0.19) | -31.39   | 9.643 (10.35-8.873) | 9.097 (10.04-8.453) | -5.66    |
| <b>Canada</b>                   | 0.36 (0.41-0.33) | 0.40 (0.46-0.34) | 9.82     | 1.78 (2.04-1.57) | 2.76 (3.66-2.04) | 54.39    | 0.20 (0.20-0.21) | 0.14 (0.12-0.17) | -28.87   | 9.473 (10.52-8.689) | 10.39 (11.94-8.911) | 9.77     |
| <b>United States of America</b> | 0.37 (0.39-0.35) | 0.46 (0.48-0.40) | 22.14    | 3.52 (3.68-3.24) | 5.10 (6.29-4.07) | 44.83    | 0.10 (0.10-0.10) | 0.09 (0.07-0.09) | -15.67   | 10.90 (11.73-10.03) | 12.94 (14.29-11.65) | 18.70    |

All indices are per 100,000 population.

**eTable 3: 1990 and 2019 female age-standardized mortality rates (ASMRs), age-standardized incidence rates (ASIRs), mortality-to-incidence indices (MIs) and disability-adjusted life years (DALYs), with associated percentage changes, for thyroid cancer in the European Union 15+ countries.**

| Country                         | ASMRs            |                  |          | ASIR             |                  |          | MIs              |                  |          | DALYS               |                     |          |
|---------------------------------|------------------|------------------|----------|------------------|------------------|----------|------------------|------------------|----------|---------------------|---------------------|----------|
|                                 | 1990.00          | 2019.00          | % Change | 1990.00          | 2019.00          | % Change | 1990.00          | 2019.00          | % Change | 1990.00             | 2019.00             | % Change |
| <b>Global</b>                   | 0.72 (0.81-0.66) | 0.62 (0.67-0.54) | -14.65   | 2.82 (3.01-2.60) | 3.73 (4.09-3.32) | 32.44    | 0.25 (0.27-0.25) | 0.16 (0.16-0.16) | -35.55   | 19.47 (21.70-17.32) | 16.94 (18.61-14.71) | -13.01   |
| <b>Australia</b>                | 0.43 (0.47-0.40) | 0.44 (0.50-0.38) | 2.10     | 3.25 (3.67-2.85) | 6.26 (8.44-4.68) | 92.63    | 0.13 (0.13-0.13) | 0.07 (0.05-0.08) | -47.00   | 11.79 (13.13-10.67) | 13.07 (15.52-11.13) | 10.84    |
| <b>Austria</b>                  | 0.89 (0.97-0.80) | 0.45 (0.51-0.38) | -49.43   | 6.91 (7.89-5.88) | 5.30 (6.80-3.98) | -23.30   | 0.12 (0.12-0.13) | 0.08 (0.07-0.09) | -34.07   | 22.52 (24.93-20.00) | 11.66 (13.66-9.906) | -48.21   |
| <b>Belgium</b>                  | 1.14 (1.25-1.00) | 0.40 (0.46-0.34) | -64.45   | 4.35 (4.89-3.82) | 3.16 (4.25-2.33) | -27.21   | 0.26 (0.25-0.26) | 0.12 (0.10-0.14) | -51.15   | 23.15 (25.36-20.98) | 9.448 (11.02-8.201) | -59.21   |
| <b>Denmark</b>                  | 0.40 (0.45-0.36) | 0.49 (0.56-0.42) | 21.06    | 2.00 (2.30-1.76) | 3.47 (4.63-2.54) | 73.54    | 0.20 (0.19-0.20) | 0.14 (0.12-0.16) | -30.24   | 10.63 (11.80-9.568) | 12.14 (14.17-10.29) | 14.19    |
| <b>Finland</b>                  | 0.79 (0.86-0.71) | 0.55 (0.63-0.48) | -29.67   | 4.14 (4.67-3.65) | 5.25 (6.98-3.90) | 26.69    | 0.19 (0.18-0.19) | 0.10 (0.09-0.12) | -44.49   | 19.03 (20.90-17.29) | 13.83 (16.06-11.68) | -27.32   |
| <b>France</b>                   | 0.86 (0.92-0.77) | 0.37 (0.42-0.31) | -56.58   | 4.00 (4.47-3.58) | 3.23 (4.47-2.38) | -19.30   | 0.21 (0.20-0.21) | 0.11 (0.09-0.13) | -46.20   | 19.90 (21.37-18.40) | 9.081 (10.63-7.771) | -54.38   |
| <b>Germany</b>                  | 0.89 (0.95-0.82) | 0.48 (0.53-0.42) | -46.05   | 5.43 (6.01-4.84) | 5.33 (7.18-3.89) | -2.01    | 0.16 (0.15-0.17) | 0.09 (0.07-0.10) | -44.94   | 22.07 (23.84-20.36) | 12.73 (14.82-10.99) | -42.34   |
| <b>Greece</b>                   | 0.73 (0.80-0.64) | 0.41 (0.45-0.35) | -43.94   | 2.93 (3.27-2.62) | 2.93 (3.82-2.22) | 0.00     | 0.24 (0.24-0.24) | 0.13 (0.11-0.16) | -43.94   | 14.51 (15.68-13.22) | 9.133 (10.40-8.047) | -37.09   |
| <b>Ireland</b>                  | 0.68 (0.75-0.61) | 0.43 (0.49-0.37) | -36.16   | 3.41 (3.89-2.96) | 4.65 (6.23-3.38) | 36.49    | 0.20 (0.19-0.20) | 0.09 (0.08-0.10) | -53.23   | 16.77 (18.53-15.08) | 11.58 (13.74-9.687) | -30.96   |
| <b>Italy</b>                    | 0.82 (0.85-0.77) | 0.46 (0.50-0.41) | -43.25   | 8.88 (9.83-7.95) | 7.73 (10.1-5.82) | -12.96   | 0.09 (0.08-0.09) | 0.06 (0.05-0.07) | -34.80   | 22.93 (24.89-21.24) | 13.47 (15.80-11.66) | -41.27   |
| <b>Luxembourg</b>               | 0.99 (1.09-0.88) | 0.46 (0.55-0.38) | -53.77   | 4.49 (5.10-3.91) | 3.80 (4.76-2.99) | -15.45   | 0.22 (0.21-0.22) | 0.12 (0.11-0.12) | -45.32   | 22.89 (25.17-20.51) | 11.08 (13.43-9.372) | -51.59   |
| <b>Netherlands</b>              | 0.56 (0.61-0.51) | 0.49 (0.56-0.42) | -11.89   | 3.27 (3.68-2.90) | 4.69 (6.15-3.45) | 43.25    | 0.17 (0.16-0.17) | 0.10 (0.09-0.12) | -38.49   | 13.73 (15.08-12.51) | 12.35 (14.22-10.58) | -10.09   |
| <b>Norway</b>                   | 0.61 (0.64-0.57) | 0.53 (0.59-0.47) | -12.78   | 3.30 (3.64-2.99) | 4.16 (5.22-3.23) | 25.98    | 0.18 (0.17-0.19) | 0.12 (0.11-0.14) | -30.77   | 15.10 (15.99-14.26) | 12.59 (14.01-11.35) | -16.65   |
| <b>Portugal</b>                 | 1.17 (1.29-1.04) | 0.45 (0.51-0.38) | -61.33   | 5.70 (6.39-4.97) | 5.77 (7.66-4.24) | 1.31     | 0.20 (0.20-0.20) | 0.07 (0.06-0.09) | -61.83   | 24.27 (26.62-21.77) | 11.55 (13.91-9.754) | -52.39   |
| <b>Spain</b>                    | 0.59 (0.63-0.54) | 0.40 (0.46-0.35) | -31.28   | 3.18 (3.55-2.83) | 3.69 (4.98-2.69) | 15.96    | 0.18 (0.17-0.19) | 0.11 (0.09-0.12) | -40.74   | 14.97 (16.15-13.78) | 10.30 (12.03-8.798) | -31.17   |
| <b>Sweden</b>                   | 0.66 (0.72-0.59) | 0.46 (0.52-0.40) | -29.91   | 2.50 (2.79-2.25) | 3.01 (3.88-2.35) | 20.27    | 0.26 (0.25-0.26) | 0.15 (0.13-0.17) | -41.72   | 14.07 (15.33-12.78) | 10.63 (11.95-9.397) | -24.48   |
| <b>United Kingdom</b>           | 0.49 (0.51-0.45) | 0.40 (0.43-0.37) | -17.24   | 2.63 (2.76-2.46) | 3.41 (4.37-2.64) | 29.51    | 0.18 (0.18-0.18) | 0.11 (0.09-0.14) | -36.09   | 11.85 (12.54-11.04) | 10.06 (11.11-9.246) | -15.06   |
| <b>Canada</b>                   | 0.48 (0.51-0.44) | 0.41 (0.47-0.35) | -13.20   | 4.17 (4.69-3.65) | 4.81 (6.38-3.54) | 15.26    | 0.11 (0.11-0.12) | 0.08 (0.07-0.10) | -24.69   | 13.04 (14.37-11.79) | 11.22 (13.05-9.527) | -14.00   |
| <b>United States of America</b> | 0.39 (0.40-0.36) | 0.41 (0.43-0.37) | 5.55     | 4.54 (4.74-4.36) | 6.06 (7.46-4.90) | 33.31    | 0.08 (0.08-0.08) | 0.06 (0.05-0.07) | -20.83   | 11.04 (12.03-10.16) | 11.89 (13.31-10.71) | 7.68     |

All indices are per 100,000 population.

**eTable 4: Joinpoint analysis for thyroid cancer age-standardized incidence rates in EU15+ countries for years 1990-2019 in males (A), females (B).**

**A)**

| Country                  | Trend 1   |                |         | Trend 2   |                  |         | Trend 3   |                  |         | Trend 4   |                 |         | AAPC      |                  |         |
|--------------------------|-----------|----------------|---------|-----------|------------------|---------|-----------|------------------|---------|-----------|-----------------|---------|-----------|------------------|---------|
|                          | Years     | EAPC (95% C.I) | P-Value | Years     | EAPC (95% C.I)   | P-Value | Years     | EAPC (95% C.I)   | P-Value | Years     | EAPC (95% C.I)  | P-Value | Years     | AAPC (95% CI)    | P value |
| Global                   | 1990-2004 | 2 (1.9-2)      | <0.001  | 2004-2010 | 3 (2.6-3.4)      | <0.001  | 2010-2019 | 0.4 (0.3-0.6)    | <0.001  |           |                 |         | 1990-2019 | 1.9 (1.8-2)      | <0.001  |
| Australia                | 1990-1995 | 1.4 (0.3-2.6)  | <0.001  | 1995-2009 | 4 (3.8-4.3)      | <0.001  | 2009-2014 | 1.9 (0.3-3.5)    | <0.001  | 2014-2019 | -0.7 (-1.8-0.4) | 0.2     | 1990-2019 | 3 (2.7-3.2)      | <0.001  |
| Austria                  | 1990-1996 | 4.6 (3.9-5.4)  | <0.001  | 1996-2002 | -2.1 (-3.1--1.2) | <0.001  | 2002-2014 | -0.9 (-1.2--0.6) | <0.001  | 2014-2019 | 0.4 (-0.6-1.4)  | 0.4     | 1990-2019 | -0.4 (-0.7--0.2) | 0.002   |
| Belgium                  | 1990-2006 | 1.2 (0.9-1.5)  | <0.001  | 2006-2012 | 3.5 (1.5-5.6)    | <0.001  | 2012-2019 | -0.8 (-1.9-0.4)  | 0.2     |           |                 |         | 1990-2019 | 1.5 (1.3-1.7)    | <0.001  |
| Denmark                  | 1990-1997 | 7.9 (6.8-9)    | <0.001  | 1997-2008 | 3.4 (2.8-4)      | <0.001  | 2008-2015 | -1.6 (-2.8--0.3) | <0.001  | 2015-2019 | 1.2 (-1.2-3.6)  | 0.3     | 1990-2019 | 2.6 (1.9-3.2)    | <0.001  |
| Finland                  | 1990-1993 | 0.2 (-3.1-3.7) | 0.9     | 1993-2011 | 3 (2.8-3.3)      | <0.001  | 2011-2019 | -0.8 (-1.6--0.1) | <0.001  |           |                 |         | 1990-2019 | 2.2 (1.9-2.5)    | <0.001  |
| France                   | 1990-1996 | 1.4 (-0.8-3.6) | 0.2     | 1996-2005 | 10.2 (8.7-11.7)  | <0.001  | 2005-2014 | -7.3 (-8.6--6)   | <0.001  | 2014-2019 | 1.8 (-1-4.8)    | 0.2     | 1990-2019 | 1.3 (0.1-2.5)    | 0.03    |
| Germany                  | 1990-1994 | 4.6 (2.9-6.2)  | <0.001  | 1994-2004 | -1.4 (-1.9--1)   | <0.001  | 2004-2011 | 3.5 (2.6-4.3)    | <0.001  | 2011-2019 | -0.3 (-0.9-0.2) | 0.2     | 1990-2019 | 0.7 (0.5-1)      | <0.001  |
| Greece                   | 1990-1993 | 6.9 (3.9-10)   | <0.001  | 1993-2006 | 2.5 (2.2-2.9)    | <0.001  | 2006-2019 | -0.8 (-1.1--0.5) | <0.001  |           |                 |         | 1990-2019 | 1.3 (0.9-1.7)    | <0.001  |
| Ireland                  | 1990-1997 | -1.1 (-2--0.1) | <0.001  | 1997-2011 | 3.6 (3.2-3.9)    | <0.001  | 2011-2019 | -0.5 (-1.2-0.3)  | 0.2     |           |                 |         | 1990-2019 | 2 (1.7-2.3)      | <0.001  |
| Italy                    | 1990-2003 | 1.7 (1.4-1.9)  | <0.001  | 2003-2019 | -0.4 (-0.6--0.2) | <0.001  |           |                  |         |           |                 |         | 1990-2019 | 0.5 (0.3-0.7)    | <0.001  |
| Luxembourg               | 1990-1995 | 3.7 (3.1-4.4)  | <0.001  | 1995-2005 | 1.8 (1.5-2.1)    | <0.001  | 2005-2016 | -2.3 (-2.5--2)   | <0.001  | 2016-2019 | 0.7 (-0.8-2.1)  | 0.3     | 1990-2019 | 0.1 (-0.3-0.5)   | 0.548   |
| Netherlands              | 1990-2004 | 0.7 (0.4-1.1)  | <0.001  | 2004-2012 | 3.7 (2.7-4.8)    | <0.001  | 2012-2019 | 0.5 (-0.5-1.5)   | 0.3     |           |                 |         | 1990-2019 | 1.8 (1.6-2)      | <0.001  |
| Norway                   | 1990-2005 | 2.2 (1.9-2.5)  | <0.001  | 2005-2009 | 5.5 (2.3-8.9)    | <0.001  | 2009-2019 | -0.6 (-1.1--0.1) | <0.001  |           |                 |         | 1990-2019 | 2 (1.8-2.3)      | <0.001  |
| Portugal                 | 1990-2002 | 2.7 (2.2-3.2)  | <0.001  | 2002-2005 | -1.2 (-8.5-6.6)  | 0.7     | 2005-2009 | 4.8 (0.8-8.8)    | <0.001  | 2009-2019 | -0.2 (-0.7-0.4) | 0.6     | 1990-2019 | 1.7 (1.5-1.9)    | <0.001  |
| Spain                    | 1990-2008 | 2.5 (2.4-2.6)  | <0.001  | 2008-2019 | -0.1 (-0.3-0.1)  | 0.3     |           |                  |         |           |                 |         | 1990-2019 | 1.6 (1.4-1.9)    | <0.001  |
| Sweden                   | 1990-1996 | 0.3 (-0.6-1.1) | 0.5     | 1996-2003 | -1.9 (-2.7--1.1) | <0.001  | 2003-2011 | 2.4 (1.7-3.1)    | <0.001  | 2011-2019 | -0.4 (-0.9-0.2) | 0.2     | 1990-2019 | 0.3 (0.1-0.5)    | 0.015   |
| United Kingdom           | 1990-2000 | 0.6 (0.3-1)    | <0.001  | 2000-2008 | 2.2 (1.6-2.9)    | <0.001  | 2008-2019 | 0.7 (0.4-1)      | <0.001  |           |                 |         | 1990-2019 | 1.3 (1.2-1.4)    | <0.001  |
| Canada                   | 1990-2006 | 2.9 (2.7-3.1)  | <0.001  | 2006-2019 | 0 (-0.2-0.3)     | 0.9     |           |                  |         |           |                 |         | 1990-2019 | 1.7 (1.4-2)      | <0.001  |
| United States of America | 1990-1994 | 3.8 (2.6-5.1)  | <0.001  | 1994-2001 | 2 (1.4-2.7)      | <0.001  | 2001-2004 | -1 (-4.7-2.9)    | 0.6     | 2004-2019 | 0.9 (0.8-1.1)   | <0.001  | 1990-2019 | 1.1 (0.9-1.3)    | <0.001  |

EAPC indicates estimated annual percentage change, with 95% confidence intervals in brackets. \*Significantly different from 0 (P<0.05).

B)

| Country                  | Trend 1   |                 |         | Trend 2   |                   |         | Trend 3   |                  |         | Trend 4   |                  |         | AAPC      |                  |         |
|--------------------------|-----------|-----------------|---------|-----------|-------------------|---------|-----------|------------------|---------|-----------|------------------|---------|-----------|------------------|---------|
|                          | Years     | EAPC (95% C.I)  | P-Value | Years     | EAPC (95% C.I)    | P-Value | Years     | EAPC (95% C.I)   | P-Value | Years     | EAPC (95% C.I)   | P-Value | Years     | AAPC (95% CI)    | P value |
| Global                   | 1990-2010 | 1.4 (1.4-1.5)   | <0.001  | 2010-2014 | -1.1 (-1.8--0.4)  | <0.001  | 2014-2019 | 0.6 (0.2-0.9)    | <0.001  |           |                  |         | 1990-2019 | 1 (0.8-1.1)      | <0.001  |
| Australia                | 1990-1996 | 3.4 (2.6-4.1)   | <0.001  | 1996-2000 | 5.5 (3.2-7.9)     | <0.001  | 2000-2009 | 3.9 (3.4-4.5)    | <0.001  | 2009-2019 | -1 (-1.4--0.7)   | <0.001  | 1990-2019 | 2.7 (2.2-3.2)    | <0.001  |
| Austria                  | 1990-2000 | 0.5 (0-0.9)     | <0.001  | 2000-2007 | -3.5 (-4.5--2.5)  | <0.001  | 2007-2019 | -0.5 (-0.9--0.2) | <0.001  |           |                  |         | 1990-2019 | -1.3 (-1.5--1.1) | <0.001  |
| Belgium                  | 1990-1994 | 2 (-0.6-4.5)    | 0.1     | 1994-2001 | -5.5 (-6.8--4.3)  | <0.001  | 2001-2007 | 2.9 (1.1-4.7)    | <0.001  | 2007-2019 | -1.7 (-2.2--1.3) | <0.001  | 1990-2019 | -1.2 (-1.6--0.9) | <0.001  |
| Denmark                  | 1990-1997 | 6.2 (5.2-7.2)   | <0.001  | 1997-2005 | 0.6 (-0.3-1.6)    | 0.2     | 2005-2010 | 2.5 (0.2-4.9)    | <0.001  | 2010-2019 | -0.1 (-0.7-0.6)  | 0.8     | 1990-2019 | 1.8 (1.4-2.1)    | <0.001  |
| Finland                  | 1990-2012 | 2.1 (1.9-2.3)   | <0.001  | 2012-2016 | -5.9 (-9.8--1.8)  | <0.001  | 2016-2019 | 1.5 (-2.7-5.8)   | 0.5     |           |                  |         | 1990-2019 | 1.1 (0.7-1.5)    | <0.001  |
| France                   | 1990-2004 | 1.1 (0.9-1.3)   | <0.001  | 2004-2009 | -1.3 (-2.6--0.1)  | <0.001  | 2009-2014 | -4.7 (-5.9--3.5) | <0.001  | 2014-2019 | -1.4 (-2.3--0.6) | <0.001  | 1990-2019 | -0.9 (-1.3--0.5) | <0.001  |
| Germany                  | 1990-1994 | 2.9 (1.5-4.4)   | <0.001  | 1994-2001 | -1.5 (-2.2--0.7)  | <0.001  | 2001-2008 | 0.5 (-0.2-1.3)   | 0.2     | 2008-2019 | -0.8 (-1.1--0.5) | <0.001  | 1990-2019 | -0.3 (-0.4--0.2) | <0.001  |
| Greece                   | 1990-1992 | 7.8 (0.8-15.2)  | <0.001  | 1992-2000 | -0.6 (-1.5-0.3)   | 0.2     | 2000-2004 | 2 (-1.3-5.5)     | 0.2     | 2004-2019 | -1.3 (-1.6--1.1) | <0.001  | 1990-2019 | -0.3 (-0.6--0.1) | 0.006   |
| Ireland                  | 1990-1998 | -0.1 (-0.8-0.7) | 0.9     | 1998-2009 | 3.2 (2.7-3.8)     | <0.001  | 2009-2019 | -0.2 (-0.7-0.4)  | 0.5     |           |                  |         | 1990-2019 | 1.6 (1.4-1.9)    | <0.001  |
| Italy                    | 1990-2003 | 1 (0.8-1.3)     | <0.001  | 2003-2016 | -2.3 (-2.6--2.1)  | <0.001  | 2016-2019 | 0.9 (-1.4-3.3)   | 0.4     |           |                  |         | 1990-2019 | -0.8 (-1.1--0.5) | <0.001  |
| Luxembourg               | 1990-1998 | 1.3 (0.7-1.8)   | <0.001  | 1998-2003 | -1.7 (-3.2--0.1)  | <0.001  | 2003-2010 | 0.2 (-0.6-1)     | 0.7     | 2010-2019 | -2.7 (-3.2--2.3) | <0.001  | 1990-2019 | -0.7 (-1--0.5)   | <0.001  |
| Netherlands              | 1990-2000 | 1.2 (0.8-1.5)   | <0.001  | 2000-2003 | 4.4 (-0.5-9.6)    | 0.1     | 2003-2010 | 1.5 (0.6-2.3)    | <0.001  | 2010-2019 | -0.1 (-0.5-0.4)  | 0.7     | 1990-2019 | 1.4 (1.2-1.6)    | <0.001  |
| Norway                   | 1990-2010 | 1.7 (1.5-1.8)   | <0.001  | 2010-2019 | -1.4 (-1.9--0.9)  | <0.001  |           |                  |         |           |                  |         | 1990-2019 | 0.9 (0.7-1.2)    | <0.001  |
| Portugal                 | 1990-1998 | 3 (2-4)         | <0.001  | 1998-2002 | -6.1 (-10.2--1.9) | <0.001  | 2002-2019 | 0.1 (-0.2-0.4)   | 0.4     |           |                  |         | 1990-2019 | -0.5 (-0.8--0.2) | 0.002   |
| Spain                    | 1990-2009 | 1.6 (1.4-1.7)   | <0.001  | 2009-2016 | -2.7 (-3.4--2)    | <0.001  | 2016-2019 | 0.4 (-1.7-2.6)   | 0.7     |           |                  |         | 1990-2019 | 0.5 (0.1-0.8)    | 0.006   |
| Sweden                   | 1990-1998 | -0.5 (-1-0)     | 0.1     | 1998-2004 | 3.1 (2-4.2)       | <0.001  | 2004-2012 | 1.2 (0.6-1.9)    | <0.001  | 2012-2019 | -1.2 (-1.8--0.6) | <0.001  | 1990-2019 | 1 (0.8-1.3)      | <0.001  |
| United Kingdom           | 1990-1997 | 0.3 (-0.3-0.8)  | 0.3     | 1997-2019 | 1.2 (1.1-1.3)     | <0.001  |           |                  |         |           |                  |         | 1990-2019 | 1.1 (1-1.2)      | <0.001  |
| Canada                   | 1990-2002 | 3.3 (3-3.6)     | <0.001  | 2002-2010 | -1.1 (-1.6--0.5)  | <0.001  | 2010-2013 | -5.4 (-9.2--1.3) | <0.001  | 2013-2019 | 0.1 (-0.6-0.8)   | 0.8     | 1990-2019 | 0.2 (-0.3-0.7)   | 0.474   |
| United States of America | 1990-2002 | 2.1 (1.9-2.3)   | <0.001  | 2002-2009 | 1.2 (0.7-1.7)     | <0.001  | 2009-2019 | -0.4 (-0.7--0.2) | <0.001  |           |                  |         | 1990-2019 | 1.1 (0.9-1.3)    | <0.001  |

EAPC indicates estimated annual percentage change, with 95% confidence intervals in brackets. \*Significantly different from 0 (P<0.05).

**eTable 5: Joinpoint analysis for thyroid cancer age-standardized mortality rates in EU15+ countries for years 1990-2019 for both sexes.**

| Country                         | Trend 1   |                  |         | Trend 2   |                  |         | Trend 3   |                  |         | Trend 4   |                  |         | AAPC      |                 |         |
|---------------------------------|-----------|------------------|---------|-----------|------------------|---------|-----------|------------------|---------|-----------|------------------|---------|-----------|-----------------|---------|
|                                 | Years     | EAPC (95% CI)    | P-Value | Years     | AAPC (95% CI)   | P value |
| <b>Global</b>                   | 1990-2004 | -0.1 (-0.2--0.1) | <0.001  | 2004-2010 | 0.2 (0-0.4)      | 0.055   | 2010-2017 | -0.6 (-0.8--0.5) | <0.001  | 2017-2019 | -0.1 (-0.9-0.8)  | 0.82    | 1990-2019 | -0.2(-0.2--0.1) | <0.001  |
| <b>Australia</b>                | 1990-1997 | -0.9 (-1.4--0.5) | <0.001  | 1997-2011 | 1.8 (1.6-2)      | <0.001  | 2011-2019 | -1.2 (-1.6--0.8) | <0.001  |           |                  |         | 1990-2019 | 0.6( 0.2-1)     | 0.004   |
| <b>Austria</b>                  | 1990-1998 | -1.2 (-1.5--0.9) | <0.001  | 1998-2008 | -3.3 (-3.5--3)   | <0.001  | 2008-2014 | -1.9 (-2.4--1.3) | <0.001  | 2014-2019 | -0.5 (-1-0.1)    | 0.096   | 1990-2019 | -2.1(-2.4--1.8) | <0.001  |
| <b>Belgium</b>                  | 1990-1993 | -0.7 (-3.9-2.6)  | 0.671   | 1993-2003 | -6.6 (-7.1--6)   | <0.001  | 2003-2012 | 0.7 (0-1.4)      | 0.05    | 2012-2019 | -1.5 (-2.3--0.6) | 0.002   | 1990-2019 | -2.7(-3.1--2.3) | <0.001  |
| <b>Denmark</b>                  | 1990-1997 | 5.6 (5-6.1)      | <0.001  | 1997-2003 | -0.5 (-1.4-0.3)  | 0.212   | 2003-2011 | 0.3 (-0.2-0.8)   | 0.264   | 2011-2019 | -1.5 (-2--1.1)   | <0.001  | 1990-2019 | 1( 0.8-1.3)     | <0.001  |
| <b>Finland</b>                  | 1990-2003 | -1.2 (-1.4--0.9) | <0.001  | 2003-2011 | 0.5 (-0.1-1.2)   | 0.112   | 2011-2019 | -2.1 (-2.6--1.6) | <0.001  |           |                  |         | 1990-2019 | -0.8(-1.1--0.5) | <0.001  |
| <b>France</b>                   | 1990-1997 | -2.2 (-2.8--1.7) | <0.001  | 1997-2005 | 0.5 (0-1.1)      | 0.065   | 2005-2014 | -5.1 (-5.6--4.7) | <0.001  | 2014-2019 | -0.1 (-1-0.8)    | 0.802   | 1990-2019 | -2.2(-2.6--1.8) | <0.001  |
| <b>Germany</b>                  | 1990-1997 | -1.1 (-1.5--0.8) | <0.001  | 1997-2001 | -5.2 (-6.4--4)   | <0.001  | 2001-2005 | -3.1 (-4.3--1.9) | <0.001  | 2005-2019 | -0.4 (-0.5--0.3) | <0.001  | 1990-2019 | -1.8(-2.1--1.6) | <0.001  |
| <b>Greece</b>                   | 1990-1993 | 2.8 (-0.4-6)     | 0.081   | 1993-2004 | -0.9 (-1.3--0.4) | 0.001   | 2004-2014 | -3.7 (-4.2--3.1) | <0.001  | 2014-2019 | 0.7 (-0.7-2.1)   | 0.339   | 1990-2019 | -1.7(-2.1--1.3) | <0.001  |
| <b>Ireland</b>                  | 1990-1996 | -3.8 (-4.3--3.3) | <0.001  | 1996-2003 | -1.8 (-2.3--1.3) | <0.001  | 2003-2014 | 0.3 (0.1-0.6)    | 0.008   | 2014-2019 | -1.5 (-2.2--0.8) | <0.001  | 1990-2019 | -1.2(-1.3--1)   | <0.001  |
| <b>Italy</b>                    | 1990-1999 | -1.4 (-1.6--1.3) | <0.001  | 1999-2016 | -1.8 (-1.9--1.7) | <0.001  | 2016-2019 | 0.1 (-0.9-1.2)   | 0.823   |           |                  |         | 1990-2019 | -1.5(-1.7--1.4) | <0.001  |
| <b>Luxembourg</b>               | 1990-1996 | -1.3 (-1.6--1.1) | <0.001  | 1996-2013 | -2.3 (-2.4--2.3) | <0.001  | 2013-2016 | -3.7 (-5.2--2.2) | <0.001  | 2016-2019 | 0 (-0.8-0.8)     | 0.988   | 1990-2019 | -2.1(-2.3--2)   | <0.001  |
| <b>Netherlands</b>              | 1990-2003 | -0.9 (-1.2--0.7) | <0.001  | 2003-2014 | 0.6 (0.2-0.9)    | 0.003   | 2014-2019 | -0.7 (-1.7-0.3)  | 0.156   |           |                  |         | 1990-2019 | -0.3(-0.4--0.1) | 0.002   |
| <b>Norway</b>                   | 1990-2004 | -0.4 (-0.5--0.3) | <0.001  | 2004-2011 | 0.7 (0.2-1.2)    | 0.005   | 2011-2019 | -1.2 (-1.5--0.9) | <0.001  |           |                  |         | 1990-2019 | -0.3(-0.5--0.1) | 0.002   |
| <b>Portugal</b>                 | 1990-1998 | -2.8 (-3.4--2.1) | <0.001  | 1998-2005 | -6.6 (-7.5--5.7) | <0.001  | 2005-2009 | 2.4 (-0.5-5.5)   | 0.101   | 2009-2019 | -1.4 (-1.9--1)   | <0.001  | 1990-2019 | -2.7(-3--2.3)   | <0.001  |
| <b>Spain</b>                    | 1990-1999 | -0.7 (-0.9--0.5) | <0.001  | 1999-2002 | -2.1 (-3.9--0.2) | 0.031   | 2002-2007 | -0.4 (-1-0.2)    | 0.194   | 2007-2019 | -0.8 (-0.9--0.7) | <0.001  | 1990-2019 | -0.9(-0.9--0.8) | <0.001  |
| <b>Sweden</b>                   | 1990-2004 | -2.1 (-2.2--2)   | <0.001  | 2004-2011 | 1.1 (0.7-1.5)    | <0.001  | 2011-2019 | -1 (-1.3--0.7)   | <0.001  |           |                  |         | 1990-2019 | -0.9(-1.1--0.7) | <0.001  |
| <b>United Kingdom</b>           | 1990-1997 | -1.4 (-1.7--1.1) | <0.001  | 1997-2011 | -0.5 (-0.7--0.4) | <0.001  | 2011-2019 | 0.3 (0-0.5)      | 0.036   |           |                  |         | 1990-2019 | -0.6(-0.7--0.5) | <0.001  |
| <b>Canada</b>                   | 1990-2006 | 0.9 (0.8-1.1)    | <0.001  | 2006-2015 | -2.2 (-2.6--1.8) | <0.001  | 2015-2019 | -0.1 (-1.3-1.1)  | 0.8     |           |                  |         | 1990-2019 | -0.3(-0.5--0.2) | <0.001  |
| <b>United States of America</b> | 1990-2002 | 0.8 (0.7-0.9)    | <0.001  | 2002-2019 | 0.2 (0.1-0.3)    | <0.001  |           |                  |         |           |                  |         | 1990-2019 | 0.4( 0.4-0.5)   | <0.001  |

EAPC indicates estimated annual percentage change, with 95% confidence intervals in brackets. \*Significantly different from 0 (P<0.05).

**eTable 6: Joinpoint analysis for thyroid cancer age-standardized mortality rates in EU15+ countries for years 1990-2019 in males (A), females (B).**

A)

| Country                  | Trend 1   |                  |         | Trend 2   |                  |         | Trend 3   |                  |         | Trend 4   |                  |         | AAPC      |                  |         |
|--------------------------|-----------|------------------|---------|-----------|------------------|---------|-----------|------------------|---------|-----------|------------------|---------|-----------|------------------|---------|
|                          | Years     | EAPC (95% C.I)   | P-Value | Years     | AAPC (95% CI)    | P value |
| Global                   | 1990-2004 | 0.6 (0.5-0.6)    | <0.001  | 2004-2011 | 1.4 (1.3-1.6)    | <0.001  | 2011-2019 | -0.3 (-0.4--0.2) | <0.001  |           |                  |         | 1990-2019 | 0.7 (0.6-0.8)    | <0.001  |
| Australia                | 1990-1994 | -1.3 (-2.3--0.3) | <0.001  | 1994-2003 | 1.1 (0.8-1.5)    | <0.001  | 2003-2012 | 2.2 (1.8-2.5)    | <0.001  | 2012-2019 | -0.9 (-1.3--0.5) | <0.001  | 1990-2019 | 1.1 (0.9-1.3)    | <0.001  |
| Austria                  | 1990-1996 | 1.6 (0.9-2.3)    | <0.001  | 1996-2001 | -3.8 (-5.1--2.5) | <0.001  | 2001-2011 | -2.3 (-2.7--1.9) | <0.001  | 2011-2019 | -0.8 (-1.2--0.3) | <0.001  | 1990-2019 | -1.8 (-2--1.6)   | <0.001  |
| Belgium                  | 1990-2006 | -1.6 (-1.9--1.3) | <0.001  | 2006-2012 | 3 (1.1-4.9)      | <0.001  | 2012-2019 | -1.6 (-2.6--0.5) | <0.001  |           |                  |         | 1990-2019 | -0.4 (-0.7--0.1) | 0.006   |
| Denmark                  | 1990-1997 | 6.4 (5.7-7.1)    | <0.001  | 1997-2008 | 1 (0.6-1.3)      | <0.001  | 2008-2015 | -2.1 (-3--1.3)   | <0.001  | 2015-2019 | -0.3 (-1.9-1.2)  | 0.7     | 1990-2019 | 0.9 (0.3-1.4)    | 0.002   |
| Finland                  | 1990-1993 | -1.1 (-3.5-1.4)  | 0.4     | 1993-2011 | 0.9 (0.7-1)      | <0.001  | 2011-2019 | -1.2 (-1.8--0.7) | <0.001  |           |                  |         | 1990-2019 | 0.4 (0.2-0.5)    | <0.001  |
| France                   | 1990-1996 | -1.1 (-2.6-0.4)  | 0.1     | 1996-2004 | 6.1 (4.8-7.4)    | <0.001  | 2004-2014 | -6.1 (-6.9--5.3) | <0.001  | 2014-2019 | 0.8 (-1.2-2.9)   | 0.4     | 1990-2019 | -0.7 (-1.5-0.1)  | 0.07    |
| Germany                  | 1990-1996 | 0.4 (-0.1-0.9)   | 0.1     | 1996-2005 | -3.7 (-4--3.4)   | <0.001  | 2005-2013 | 1.9 (1.5-2.3)    | <0.001  | 2013-2019 | -1.2 (-1.8--0.7) | <0.001  | 1990-2019 | -1 (-1.3--0.6)   | <0.001  |
| Greece                   | 1990-1992 | 4.5 (-0.2-9.3)   | 0.1     | 1992-2001 | 1.4 (0.9-1.9)    | <0.001  | 2001-2013 | -1.5 (-1.8--1.1) | <0.001  | 2013-2019 | 0.2 (-0.5-1)     | 0.5     | 1990-2019 | -0.3 (-0.5-0)    | 0.029   |
| Ireland                  | 1990-1996 | -3.6 (-4.2--3)   | <0.001  | 1996-2006 | -0.6 (-0.9--0.2) | <0.001  | 2006-2013 | 1 (0.4-1.7)      | <0.001  | 2013-2019 | -1.3 (-1.9--0.7) | <0.001  | 1990-2019 | -0.5 (-0.8--0.3) | <0.001  |
| Italy                    | 1990-2012 | -0.7 (-0.7--0.6) | <0.001  | 2012-2016 | -1.8 (-3.2--0.5) | <0.001  | 2016-2019 | 0 (-1.3-1.4)     | 0.9     |           |                  |         | 1990-2019 | -0.8 (-0.8--0.7) | <0.001  |
| Luxembourg               | 1990-2004 | -0.3 (-0.4--0.2) | <0.001  | 2004-2016 | -2.9 (-3.1--2.8) | <0.001  | 2016-2019 | -0.1 (-1.2-1)    | 0.8     |           |                  |         | 1990-2019 | -1.6 (-1.8--1.3) | <0.001  |
| Netherlands              | 1990-2004 | -1 (-1.3--0.7)   | <0.001  | 2004-2016 | 1.4 (1-1.9)      | <0.001  | 2016-2019 | -1.4 (-4.5-1.8)  | 0.4     |           |                  |         | 1990-2019 | 0.2 (-0.1-0.4)   | 0.152   |
| Norway                   | 1990-2004 | -0.3 (-0.5--0.1) | <0.001  | 2004-2008 | 3.2 (1.2-5.3)    | <0.001  | 2008-2019 | -0.9 (-1.2--0.6) | <0.001  |           |                  |         | 1990-2019 | 0.2 (0-0.3)      | 0.029   |
| Portugal                 | 1990-2002 | -0.3 (-0.7-0.1)  | 0.1     | 2002-2005 | -4.5 (-10.6-2)   | 0.2     | 2005-2009 | 2.8 (-0.5-6.2)   | 0.1     | 2009-2019 | -1.1 (-1.6--0.6) | <0.001  | 1990-2019 | -0.6 (-0.7--0.4) | <0.001  |
| Spain                    | 1990-1994 | -0.8 (-1.4--0.1) | <0.001  | 1994-2014 | 0.2 (0.2-0.3)    | <0.001  | 2014-2019 | -0.6 (-1.1--0.1) | <0.001  |           |                  |         | 1990-2019 | 0.1 (0-0.1)      | 0.001   |
| Sweden                   | 1990-1996 | -0.4 (-1.1-0.3)  | 0.3     | 1996-2003 | -2.8 (-3.5--2.1) | <0.001  | 2003-2011 | 1.9 (1.3-2.5)    | <0.001  | 2011-2019 | -0.8 (-1.3--0.4) | <0.001  | 1990-2019 | -0.4 (-0.6--0.1) | 0.005   |
| United Kingdom           | 1990-2001 | -0.8 (-1--0.7)   | <0.001  | 2001-2008 | 0.5 (0.1-0.9)    | <0.001  | 2008-2011 | -1 (-3.4-1.4)    | 0.4     | 2011-2019 | 0.3 (0-0.5)      | 0.1     | 1990-2019 | -0.2 (-0.3--0.1) | <0.001  |
| Canada                   | 1990-2002 | 0.9 (0.7-1.1)    | <0.001  | 2002-2005 | 2.8 (-0.6-6.2)   | 0.1     | 2005-2019 | -0.8 (-1--0.6)   | <0.001  |           |                  |         | 1990-2019 | 0.4 (0.2-0.6)    | <0.001  |
| United States of America | 1990-2001 | 1.4 (1.2-1.5)    | <0.001  | 2001-2004 | -1.3 (-3.3-0.7)  | 0.2     | 2004-2019 | 0.6 (0.6-0.7)    | <0.001  |           |                  |         | 1990-2019 | 0.6 (0.5-0.7)    | <0.001  |

EAPC indicates estimated annual percentage change, with 95% confidence intervals in brackets. \*Significantly different from 0 (P<0.05).



B)

| Country                  | Trend 1   |                  |         | Trend 2   |                    |         | Trend 3   |                  |         | Trend 4   |                  |         | AAPC      |                  |         |
|--------------------------|-----------|------------------|---------|-----------|--------------------|---------|-----------|------------------|---------|-----------|------------------|---------|-----------|------------------|---------|
|                          | Years     | EAPC (95% C.I)   | P-Value | Years     | EAPC (95% C.I)     | P-Value | Years     | EAPC (95% C.I)   | P-Value | Years     | EAPC (95% C.I)   | P-Value | Years     | AAPC (95% CI)    | P value |
| Global                   | 1990-1993 | 0.1 (-0.3-0.4)   | 0.7     | 1993-2009 | -0.5 (-0.5--0.5)   | <0.001  | 2009-2014 | -1.1 (-1.3--0.8) | <0.001  | 2014-2019 | -0.5 (-0.7--0.3) | <0.001  | 1990-2019 | -0.6 (-0.6--0.6) | <0.001  |
| Australia                | 1990-1997 | -1.3 (-1.7--0.9) | <0.001  | 1997-2010 | 1.9 (1.7-2.1)      | <0.001  | 2010-2019 | -1.5 (-1.8--1.2) | <0.001  |           |                  |         | 1990-2019 | 0.6 (0.3-0.8)    | <0.001  |
| Austria                  | 1990-1996 | -3.1 (-3.7--2.4) | <0.001  | 1996-1999 | 0 (-3.8-4)         | 1       | 1999-2009 | -3.8 (-4.2--3.5) | <0.001  | 2009-2019 | -1.2 (-1.5--0.9) | <0.001  | 1990-2019 | -2.6 (-2.7--2.4) | <0.001  |
| Belgium                  | 1990-1994 | -0.8 (-2.9-1.3)  | 0.4     | 1994-2001 | -10.7 (-11.7--9.7) | <0.001  | 2001-2019 | -1.2 (-1.4--1)   | <0.001  |           |                  |         | 1990-2019 | -3.8 (-4.5--3.2) | <0.001  |
| Denmark                  | 1990-1997 | 5 (4.4-5.6)      | <0.001  | 1997-2008 | -0.8 (-1.2--0.5)   | <0.001  | 2008-2011 | 2.8 (-1.4-7.3)   | 0.2     | 2011-2019 | -1.6 (-2.1--1.2) | <0.001  | 1990-2019 | 0.4 (0-0.7)      | 0.031   |
| Finland                  | 1990-2002 | -1.9 (-2.2--1.5) | <0.001  | 2002-2012 | 0.1 (-0.4-0.7)     | 0.5     | 2012-2016 | -4 (-6.6--1.4)   | <0.001  | 2016-2019 | -0.3 (-3-2.5)    | 0.8     | 1990-2019 | -1.1 (-1.3--1)   | <0.001  |
| France                   | 1990-2016 | -3.2 (-3.3--3.1) | <0.001  | 2016-2019 | -0.1 (-1.6-1.4)    | 0.9     |           |                  |         |           |                  |         | 1990-2019 | -3.1 (-3.2--3)   | <0.001  |
| Germany                  | 1990-1997 | -1.7 (-2--1.4)   | <0.001  | 1997-2001 | -5.5 (-6.6--4.3)   | <0.001  | 2001-2007 | -3 (-3.6--2.5)   | <0.001  | 2007-2019 | -0.9 (-1--0.7)   | <0.001  | 1990-2019 | -2.4 (-2.7--2.2) | <0.001  |
| Greece                   | 1990-1992 | 4.3 (-2.1-11.1)  | 0.2     | 1992-2004 | -1.4 (-1.8--1)     | <0.001  | 2004-2015 | -4.7 (-5.2--4.3) | <0.001  | 2015-2019 | 1.7 (-0.3-3.7)   | 0.1     | 1990-2019 | -2.7 (-3--2.4)   | <0.001  |
| Ireland                  | 1990-1994 | -4.3 (-5.3--3.2) | <0.001  | 1994-2002 | -2.9 (-3.3--2.4)   | <0.001  | 2002-2015 | 0.1 (-0.1-0.3)   | 0.4     | 2015-2019 | -1.7 (-2.8--0.6) | <0.001  | 1990-2019 | -1.2 (-1.5--0.9) | <0.001  |
| Italy                    | 1990-2000 | -1.9 (-2.1--1.8) | <0.001  | 2000-2014 | -2.5 (-2.6--2.4)   | <0.001  | 2014-2017 | -1 (-2.5-0.6)    | 0.2     | 2017-2019 | 0.6 (-0.9-2.2)   | 0.4     | 1990-2019 | -2.2 (-2.3--2.1) | <0.001  |
| Luxembourg               | 1990-1996 | -2.1 (-2.8--1.4) | <0.001  | 1996-2003 | -4.2 (-4.8--3.5)   | <0.001  | 2003-2019 | -2.3 (-2.5--2.2) | <0.001  | 1990-1998 | -1.3 (-1.8--0.9) | <0.001  | 1990-2019 | -2.9 (-3--2.7)   | <0.001  |
| Netherlands              | 1998-2014 | 0 (-0.1-0.2)     | 0.6     | 2014-2019 | -0.9 (-1.8-0)      | <0.001  |           |                  |         |           |                  |         | 1990-2019 | -0.3 (-0.4--0.2) | <0.001  |
| Norway                   | 1990-2004 | -0.4 (-0.6--0.3) | <0.001  | 2004-2012 | 0.1 (-0.2-0.5)     | 0.5     | 2012-2019 | -1.2 (-1.5--0.8) | <0.001  |           |                  |         | 1990-2019 | -0.4 (-0.4--0.3) | <0.001  |
| Portugal                 | 1990-1998 | -3 (-3.8--2.1)   | <0.001  | 1998-2003 | -10.7 (-12.9--8.4) | <0.001  | 2003-2019 | -0.9 (-1.3--0.6) | <0.001  |           |                  |         | 1990-2019 | -3.7 (-4.2--3.1) | <0.001  |
| Spain                    | 1990-1999 | -1 (-1.3--0.7)   | <0.001  | 1999-2002 | -3.4 (-6.4--0.2)   | <0.001  | 2002-2007 | -0.8 (-1.8-0.3)  | 0.1     | 2007-2019 | -1.4 (-1.6--1.3) | <0.001  | 1990-2019 | -1.4 (-1.5--1.4) | <0.001  |
| Sweden                   | 1990-1998 | -2.8 (-3.2--2.5) | <0.001  | 1998-2005 | -1.2 (-1.7--0.7)   | <0.001  | 2005-2011 | 0.4 (-0.3-1.1)   | 0.2     | 2011-2019 | -1 (-1.4--0.7)   | <0.001  | 1990-2019 | -1 (-1.2--0.8)   | <0.001  |
| United Kingdom           | 1990-1995 | -1.6 (-2.3--1)   | <0.001  | 1995-2010 | -0.9 (-1--0.7)     | <0.001  | 2010-2019 | 0.3 (0-0.6)      | <0.001  |           |                  |         | 1990-2019 | -0.7 (-0.8--0.5) | <0.001  |
| Canada                   | 1990-2005 | 0.9 (0.7-1.2)    | <0.001  | 2005-2015 | -2.9 (-3.4--2.5)   | <0.001  | 2015-2019 | -0.1 (-1.7-1.6)  | 0.9     |           |                  |         | 1990-2019 | -0.7 (-1.1--0.4) | <0.001  |
| United States of America | 1990-1996 | 0.1 (-0.2-0.4)   | 0.5     | 1996-2007 | 0.8 (0.7-1)        | <0.001  | 2007-2019 | -0.3 (-0.4--0.2) | <0.001  |           |                  |         | 1990-2019 | 0.3 (0.2-0.4)    | <0.001  |

EAPC indicates estimated annual percentage change, with 95% confidence intervals in brackets. \*Significantly different from 0 (P<0.05).

**eTable 7: Joinpoint analysis for thyroid cancer age-standardized DALYs in EU15+ countries for years 1990-2019 in both sexes.**

| Country                         | Trend 1   |                  |         | Trend 2   |                  |         | Trend 3   |                  |         | Trend 4   |                  |         | AAPC      |                  |         |
|---------------------------------|-----------|------------------|---------|-----------|------------------|---------|-----------|------------------|---------|-----------|------------------|---------|-----------|------------------|---------|
|                                 | Years     | EAPC (95% CI)    | P-Value | Years     | AAPC (95% CI)    | P value |
| <b>Global</b>                   | 1990-2011 | 0( -0.1-0)       | 0.259   | 2011-2015 | -0.9( -1.5--0.2) | 0.009   | 2015-2019 | -0.1( -0.5-0.3)  | 0.665   |           |                  |         | 1990-2019 | -0.2( -0.2--0.1) | <0.001  |
| <b>Australia</b>                | 1990-1995 | -0.9( -1.6--0.2) | 0.012   | 1995-2005 | 1.6( 1.3-1.9)    | <0.001  | 2005-2009 | 3.2( 1.6-4.9)    | 0.001   | 2009-2019 | -0.8( -1.1--0.6) | <0.001  | 1990-2019 | 0.8( 0.5-1.1)    | <0.001  |
| <b>Austria</b>                  | 1990-1998 | -0.9( -1.2--0.6) | <0.001  | 1998-2007 | -3.5( -3.8--3.2) | <0.001  | 2007-2014 | -1.8( -2.2--1.4) | <0.001  | 2014-2019 | -0.5( -1.1-0.1)  | 0.111   | 1990-2019 | -2( -2.4--1.7)   | <0.001  |
| <b>Belgium</b>                  | 1990-1994 | -1.6( -3.4-0.2)  | 0.079   | 1994-2002 | -5.4( -6.1--4.7) | <0.001  | 2002-2011 | 0.5( -0.2-1.1)   | 0.137   | 2011-2019 | -1.4( -2--0.8)   | <0.001  | 1990-2019 | -2.1( -2.4--1.7) | <0.001  |
| <b>Denmark</b>                  | 1990-1997 | 5.1( 4.4-5.8)    | <0.001  | 1997-2010 | -0.2( -0.4-0.1)  | 0.265   | 2010-2019 | -1.3( -1.7--0.9) | <0.001  |           |                  |         | 1990-2019 | 0.9( 0.6-1.1)    | <0.001  |
| <b>Finland</b>                  | 1990-2002 | -0.9( -1.2--0.7) | <0.001  | 2002-2011 | 0.9( 0.4-1.4)    | 0.002   | 2011-2016 | -3.4( -4.8--1.9) | <0.001  | 2016-2019 | -0.3( -2.7-2.1)  | 0.769   | 1990-2019 | -0.7( -1--0.4)   | <0.001  |
| <b>France</b>                   | 1990-1996 | -2( -3--1)       | 0.001   | 1996-2005 | 2.1( 1.4-2.7)    | <0.001  | 2005-2014 | -6.1( -6.7--5.5) | <0.001  | 2014-2019 | -0.1( -1.5-1.2)  | 0.825   | 1990-2019 | -1.9( -2.4--1.4) | <0.001  |
| <b>Germany</b>                  | 1990-1996 | -0.8( -1.3--0.4) | 0.001   | 1996-2004 | -3.8( -4.2--3.5) | <0.001  | 2004-2012 | -0.2( -0.5-0.2)  | 0.275   | 2012-2019 | -0.9( -1.2--0.6) | <0.001  | 1990-2019 | -1.7( -1.9--1.4) | <0.001  |
| <b>Greece</b>                   | 1990-1992 | 4.4( 1.2-7.7)    | 0.01    | 1992-2005 | -0.8( -0.9--0.6) | <0.001  | 2005-2014 | -2.4( -2.7--2.1) | <0.001  | 2014-2019 | 0.3( -0.4-1)     | 0.358   | 1990-2019 | -0.9( -1.3--0.6) | <0.001  |
| <b>Ireland</b>                  | 1990-1996 | -3.3( -3.9--2.8) | <0.001  | 1996-2003 | -1.2( -1.8--0.7) | <0.001  | 2003-2012 | 0.6( 0.2-1)      | 0.002   | 2012-2019 | -1.2( -1.6--0.8) | <0.001  | 1990-2019 | -1( -1.2--0.7)   | <0.001  |
| <b>Italy</b>                    | 1990-2001 | -1.2( -1.3--1)   | <0.001  | 2001-2016 | -1.9( -2--1.8)   | <0.001  | 2016-2019 | 0.3( -0.8-1.5)   | 0.593   |           |                  |         | 1990-2019 | -1.6( -1.7--1.4) | <0.001  |
| <b>Luxembourg</b>               | 1990-1996 | -1( -1.2--0.8)   | <0.001  | 1996-2006 | -2( -2.1--1.8)   | <0.001  | 2006-2016 | -2.7( -2.9--2.6) | <0.001  | 2016-2019 | -0.4( -1-0.3)    | 0.263   | 1990-2019 | -2( -2.1--1.9)   | <0.001  |
| <b>Netherlands</b>              | 1990-2000 | -0.9( -1.3--0.6) | <0.001  | 2000-2019 | 0.2( 0-0.3)      | 0.011   |           |                  |         |           |                  |         | 1990-2019 | -0.2( -0.3--0.1) | 0.007   |
| <b>Norway</b>                   | 1990-2004 | -0.3( -0.5--0.2) | <0.001  | 2004-2010 | 0.8( 0.1-1.5)    | 0.022   | 2010-2019 | -1.5( -1.8--1.2) | <0.001  |           |                  |         | 1990-2019 | -0.4( -0.6--0.2) | <0.001  |
| <b>Portugal</b>                 | 1990-1998 | -1.5( -2.1--1)   | <0.001  | 1998-2005 | -5.4( -6.3--4.6) | <0.001  | 2005-2009 | 2.2( -0.4-4.9)   | 0.094   | 2009-2019 | -1.4( -1.8--1)   | <0.001  | 1990-2019 | -2.1( -2.4--1.7) | <0.001  |
| <b>Spain</b>                    | 1990-2005 | -0.7( -0.8--0.6) | <0.001  | 2005-2008 | 0( -1.9-2)       | 0.983   | 2008-2016 | -1.6( -1.8--1.3) | <0.001  | 2016-2019 | -0.1( -1.1-0.8)  | 0.755   | 1990-2019 | -0.9( -0.9--0.8) | <0.001  |
| <b>Sweden</b>                   | 1990-2000 | -2.2( -2.3--2)   | <0.001  | 2000-2005 | -0.2( -1-0.5)    | 0.549   | 2005-2011 | 1.2( 0.6-1.7)    | <0.001  | 2011-2019 | -1.2( -1.4--0.9) | <0.001  | 1990-2019 | -0.7( -0.9--0.5) | <0.001  |
| <b>United Kingdom</b>           | 1990-2000 | -1.1( -1.3--0.9) | <0.001  | 2000-2008 | 0( -0.3-0.3)     | 0.942   | 2008-2011 | -1.2( -3.6-1.2)  | 0.303   | 2011-2019 | 0.4( 0.1-0.6)    | 0.009   | 1990-2019 | -0.5( -0.6--0.4) | <0.001  |
| <b>Canada</b>                   | 1990-2005 | 1.2( 1-1.4)      | <0.001  | 2005-2015 | -2.2( -2.6--1.9) | <0.001  | 2015-2019 | -0.1( -1.4-1.2)  | 0.862   |           |                  |         | 1990-2019 | -0.3( -0.5--0.1) | <0.001  |
| <b>United States of America</b> | 1990-2001 | 1( 0.9-1.2)      | <0.001  | 2001-2019 | 0.1( 0-0.2)      | 0.009   |           |                  |         |           |                  |         | 1990-2019 | 0.4( 0.4-0.5)    | <0.001  |

EAPC indicates estimated annual percentage change, with 95% confidence intervals in brackets. \*Significantly different from 0 (P<0.05).
